# Supplementary material
Source: publisher site journal article supplement (https://www.spandidos-publications.com/4448/downloadSupplementary)
Supplement: Supplementary file 1 [file downloadSupplementary]

## Sheet: RFTN1.kegggsea
Table SXIV. The single-gene Gene Set Enrichment Analysis results for RFTN1 in the GSE40275 dataset
ID	Description	setSize	enrichmentScore	NES	pvalue	p.adjust	qvalues	rank	leading_edge	core_enrichment
hsa04640	Hematopoietic cell lineage	50	0.786875	2.58051	1e-10	1.04667e-08	8.24561e-09	675	tags=46%, list=8%, signal=43%	3123/3125/3126/3117/3127/952/3109/100133941/929/3119/3113/3115/3122/3112/951/917/3108/920/915/966/914/916/960
hsa05150	Staphylococcus aureus infection	38	0.826389	2.5499	1e-10	1.04667e-08	8.24561e-09	739	tags=68%, list=9%, signal=63%	3123/3125/3126/3117/713/3127/716/3109/714/719/712/3119/3113/3115/3122/3112/718/2214/3108/3075/717/715/5724/3426/2357/2213
hsa05322	Systemic lupus erythematosus	40	0.807438	2.52547	1e-10	1.04667e-08	8.24561e-09	554	tags=55%, list=7%, signal=52%	3123/3125/3126/3117/713/3127/716/3109/714/712/3119/3113/3115/3122/3112/718/2214/3108/730/717/715/942
hsa05310	Asthma	21	0.885993	2.46855	2.69312e-10	2.1141e-08	1.66548e-08	252	tags=62%, list=3%, signal=60%	3123/3125/3126/3117/3127/3109/3119/3113/2207/3115/3122/3112/3108
hsa05145	Toxoplasmosis	42	0.765666	2.44401	4.5811e-10	2.87693e-08	2.26644e-08	1109	tags=57%, list=13%, signal=50%	3123/3125/3126/3117/3127/3109/3119/5294/3113/3115/3122/3112/10000/3108/23533/240/598/10105/836/4261/3304/2775/1234/1147
hsa05321	Inflammatory bowel disease	19	0.886627	2.40753	1.4675e-09	7.67992e-08	6.05022e-08	252	tags=63%, list=3%, signal=61%	3123/3125/3126/3117/3127/3109/3119/3113/3115/3122/3112/3108
hsa05152	Tuberculosis	84	0.62312	2.2608	8.89638e-09	3.99066e-07	3.14384e-07	1154	tags=40%, list=14%, signal=35%	3123/3125/3126/3117/3127/3109/929/3119/3113/2207/3115/972/3122/3112/718/10000/2214/3108/817/533/64581/1054/836/26253/2213/843/808/4261/30835/50617/816/537/527/22925
hsa04145	Phagosome	69	0.649583	2.27948	1.88395e-08	7.3945e-07	5.82537e-07	1628	tags=52%, list=20%, signal=42%	3123/3125/3126/3117/3127/3109/929/3119/3113/3115/3122/3112/718/2214/3108/533/715/64581/60/2213/30835/50617/5879/537/527/22925/526/2212/3118/9146/4973/3106/3111/71/5289/23545
hsa04940	Type I diabetes mellitus	31	0.781407	2.35098	2.48347e-08	8.66455e-07	6.82591e-07	1011	tags=58%, list=12%, signal=51%	3123/3125/3126/3117/3127/3109/3119/3113/3115/3122/3112/3108/5799/5551/942/3002/940/941
hsa04672	Intestinal immune network for IgA production	25	0.821019	2.35147	3.74457e-08	1.15723e-06	9.11662e-07	252	tags=48%, list=3%, signal=47%	3123/3125/3126/3117/3127/3109/3119/3113/3115/3122/3112/3108
hsa05320	Autoimmune thyroid disease	30	0.779796	2.34059	4.05398e-08	1.15723e-06	9.11662e-07	1011	tags=57%, list=12%, signal=50%	3123/3125/3126/3117/3127/3109/3119/3113/3115/3122/3112/3108/5551/942/3002/940/941
hsa04612	Antigen processing and presentation	43	0.723921	2.3214	4.93881e-08	1.29232e-06	1.01809e-06	262	tags=33%, list=3%, signal=32%	3123/3125/3126/3117/3127/3109/3119/3113/3115/972/3122/3112/3108/920
hsa05332	Graft-versus-host disease	27	0.796682	2.32725	8.46807e-08	1.91315e-06	1.50717e-06	1011	tags=63%, list=12%, signal=56%	3123/3125/3126/3117/3127/3109/3119/3113/3115/3122/3112/3108/5551/942/3002/940/941
hsa05169	Epstein-Barr virus infection	104	0.562665	2.12526	8.52996e-08	1.91315e-06	1.50717e-06	1660	tags=45%, list=20%, signal=37%	3123/3125/3126/3117/3127/10018/3109/3119/3113/3115/3122/3112/9134/917/898/10000/3108/915/695/890/8900/5336/1021/916/4939/836/960/5708/1647/11047/5879/1147/5293/919/5702/3065/10213/5717/3118/1017/5718/3106/3111/965/5710/930/1026
hsa05330	Allograft rejection	29	0.783773	2.33504	1.08628e-07	2.27394e-06	1.79141e-06	1011	tags=59%, list=12%, signal=52%	3123/3125/3126/3117/3127/3109/3119/3113/3115/3122/3112/3108/5551/942/3002/940/941
hsa05140	Leishmaniasis	21	0.832509	2.31954	1.3221e-07	2.59462e-06	2.04403e-06	459	tags=71%, list=6%, signal=68%	3123/3125/3126/3117/3127/3109/3119/3113/3115/3122/3112/718/2214/3108/5777
hsa05166	Human T-cell leukemia virus 1 infection	120	0.533182	2.05348	1.42383e-07	2.62989e-06	2.07182e-06	565	tags=24%, list=7%, signal=23%	3123/3125/3126/3117/3127/701/3109/991/3119/3113/3115/3122/9232/3112/9134/917/898/10000/9133/107/3108/920/915/890/1029/2113/8900/598/916
hsa04659	Th17 cell differentiation	40	0.707615	2.21325	3.92474e-07	6.8465e-06	5.39365e-06	288	tags=40%, list=3%, signal=39%	3123/3125/3126/3117/3127/3109/196/3119/3113/3115/3122/3112/917/3108/920/915
hsa04658	Th1 and Th2 cell differentiation	33	0.738243	2.23471	1.26111e-06	2.08415e-05	1.64189e-05	288	tags=45%, list=3%, signal=44%	3123/3125/3126/3117/3127/3109/3119/3113/3115/3122/3112/917/3108/920/915
hsa04514	Cell adhesion molecules	83	0.561779	2.03052	2.55444e-06	4.01048e-05	3.15944e-05	1058	tags=41%, list=13%, signal=36%	214/3123/3125/3126/7412/1462/3117/3127/3109/5788/1000/3119/3113/3115/3122/3112/5797/3108/80380/920/914/5175/29126/57863/942/10666/23705/79679/940/80381/50848/941/925/923
hsa05168	Herpes simplex virus 1 infection	353	-0.370073	-1.66341	5.32533e-06	7.69009e-05	6.05824e-05	1972	tags=40%, list=24%, signal=32%	163081/162967/374879/7743/7596/90321/147657/285268/7752/596/199704/7652/7769/79891/284306/7768/22869/7569/7710/146434/158431/79898/390980/79973/7561/284390/10172/92283/126068/126017/163131/56242/7571/113835/285267/6041/155054/55900/169841/162966/7673/389114/79818/355/7761/91120/388566/5290/57615/126295/25833/641339/57677/90317/7567/93134/79788/10780/90338/55762/147694/147837/84775/148103/282890/5…
hsa04610	Complement and coagulation cascades	60	0.605609	2.05304	5.38796e-06	7.69009e-05	6.05824e-05	695	tags=30%, list=8%, signal=28%	713/11326/716/714/719/712/5328/718/5329/3075/730/2/717/966/715/2162/3426/5327
hsa05164	Influenza A	75	0.574595	2.05379	6.86648e-06	9.37424e-05	7.38501e-05	1572	tags=41%, list=19%, signal=34%	3123/3125/3126/3117/3127/3109/3119/3113/3115/3122/3112/10000/3108/1021/6352/4939/836/834/60/9230/4261/1147/6347/5293/4928/8766/3118/3111/71/8480/291
hsa04061	Viral protein interaction with cytokine and cytokine receptor	40	0.665642	2.08197	9.19458e-06	0.000118746	9.35481e-05	1290	tags=38%, list=15%, signal=32%	6362/6363/729230/6375/1230/6352/1233/6356/6364/1236/6348/1235/1234/6347/56477
hsa05323	Rheumatoid arthritis	50	0.615937	2.01993	9.45433e-06	0.000118746	9.35481e-05	1240	tags=50%, list=15%, signal=43%	3123/3125/3126/3117/54/3127/3109/3119/3113/3115/3122/3112/3108/533/6352/942/6364/940/50617/6348/941/537/527/526/6347
hsa04062	Chemokine signaling pathway	133	0.487882	1.88157	1.37283e-05	0.000165796	0.000130614	1504	tags=35%, list=18%, signal=29%	6362/6363/5294/2785/5332/10000/2786/107/7409/729230/3055/54331/6375/23533/2185/5336/1230/409/5880/6352/1233/2782/23236/6356/6364/1236/7410/109/6348/2787/5330/1235/1234/5879/1147/2870/6347/5567/2931/56477/5293/10451/5566/94235/57580/1237
hsa04110	Cell cycle	82	0.54215	1.95783	1.42817e-05	0.000166091	0.000130846	1500	tags=48%, list=18%, signal=39%	701/991/5347/699/9232/9134/898/9133/993/890/1032/891/1029/990/995/8900/1021/5591/994/1111/8317/5885/5111/5933/8243/7465/7534/1647/4087/10971/51433/7533/1030/7529/3065/7532/8881/9184/1017
hsa05416	Viral myocarditis	40	0.64119	2.00548	3.93434e-05	0.000441209	0.000347583	1099	tags=50%, list=13%, signal=44%	3123/3125/3126/3117/3127/3109/3119/3113/3115/3122/3112/3108/5551/5880/942/836/60/940/941/5879
hsa05170	Human immunodeficiency virus 1 infection	121	0.455836	1.75144	0.000137088	0.00148433	0.00116935	1109	tags=25%, list=13%, signal=22%	2785/917/10000/2786/9133/920/915/54331/891/995/2185/5336/1072/598/5880/916/2782/836/5063/1111/808/2787/7465/162/10298/2775/8907/1234/5879/1147
hsa04060	Cytokine-cytokine receptor interaction	73	0.521721	1.86152	0.00016208	0.00169644	0.00133645	1290	tags=29%, list=15%, signal=25%	6362/6363/939/920/729230/6375/93/1230/6352/1233/92/6356/6364/1236/130399/9518/6348/1235/1234/6347/56477
hsa05142	Chagas disease	54	0.567091	1.89809	0.000247626	0.00246741	0.00194382	1311	tags=41%, list=16%, signal=35%	713/714/712/718/5521/5332/917/10000/107/915/6352/916/23236/6348/2775/5330/1147/4087/6347/2769/5293/919
hsa05171	Coronavirus disease - COVID-19	52	0.552296	1.84454	0.000251456	0.00246741	0.00194382	1420	tags=38%, list=17%, signal=32%	713/716/714/719/712/718/730/717/715/2162/5336/4939/834/728/1147/1675/6347/5293/2212/6868
hsa05133	Pertussis	31	0.647336	1.94761	0.000282598	0.00268896	0.00211836	812	tags=39%, list=10%, signal=35%	713/716/714/712/929/718/717/715/1072/836/834/808
hsa04064	NF-kappa B signaling pathway	33	0.629995	1.90704	0.000622022	0.00574456	0.00452555	1118	tags=36%, list=13%, signal=32%	7412/6363/929/5328/695/5336/598/597/142/1647/1147/7535
hsa04650	Natural killer cell mediated cytotoxicity	58	0.539189	1.82142	0.00070888	0.00635852	0.00500923	1609	tags=34%, list=19%, signal=28%	962/2207/2214/7409/10870/2185/5777/5336/5551/5880/836/7410/3002/5879/7535/5293/919/10451/3106/2885
hsa04613	Neutrophil extracellular trap formation	67	0.515963	1.79693	0.00073172	0.00635852	0.00500923	1572	tags=37%, list=19%, signal=31%	718/9734/5332/10000/2214/64581/5336/5880/10105/23236/837/2357/834/366/60/5330/728/27180/5879/5293/1183/3065/2212/71/291
hsa00640	Propanoate metabolism	17	-0.72105	-1.87155	0.000749253	0.00635852	0.00500923	1812	tags=76%, list=22%, signal=60%	5096/8310/26275/51/31/593/84532/3030/4329/5095/32/55902/18
hsa04726	Serotonergic synapse	65	0.507299	1.7624	0.000819707	0.00677337	0.00533604	1499	tags=31%, list=18%, signal=25%	2562/2785/5332/2786/54331/240/773/2782/23236/836/6570/6571/2787/100137049/2775/5330/5567/5566/94235/775
hsa03440	Homologous recombination	20	0.700042	1.92553	0.000867385	0.00698356	0.00550163	1452	tags=60%, list=17%, signal=50%	7516/5888/8438/5932/580/25788/83990/5425/675/5424/10714/672
hsa04666	Fc gamma R-mediated phagocytosis	61	0.512848	1.75247	0.00101183	0.00794289	0.00625739	1541	tags=41%, list=18%, signal=34%	5788/10095/10000/2214/7409/3055/5336/1072/5880/273/9846/2213/10096/7410/2934/100137049/5879/7408/81873/10092/5293/2212/10451/5337/8394
hsa05203	Viral carcinogenesis	95	0.446171	1.6527	0.00145175	0.0111183	0.00875896	1787	tags=40%, list=21%, signal=32%	5366/991/9134/718/9734/898/890/1029/8900/1021/1233/1108/836/1111/2934/5933/7534/5922/1234/5879/10971/7533/2960/1030/5567/5293/7529/3065/7532/5566/1017/1237/3106/2885/1026/87/3265/2958
hsa05340	Primary immunodeficiency	22	0.679609	1.91817	0.00158278	0.0118332	0.00932213	1165	tags=50%, list=14%, signal=43%	5788/973/920/915/695/916/4261/925/7535/100/7374
hsa04664	Fc epsilon RI signaling pathway	35	0.585413	1.78907	0.0017957	0.0131128	0.0103302	1818	tags=49%, list=22%, signal=38%	2207/10000/7409/695/241/240/5336/5880/9846/7410/100137049/5879/5293/10451/2885/3265/5335
hsa04660	T cell receptor signaling pathway	54	0.519846	1.73996	0.00218533	0.0155953	0.0122859	1419	tags=41%, list=17%, signal=34%	5788/917/10000/7409/920/915/5777/916/5063/9402/7410/940/10125/10298/925/1147/7535/868/5293/919/5588/10451
hsa04662	B cell receptor signaling pathway	41	0.551099	1.73795	0.00233961	0.0163252	0.012861	1761	tags=51%, list=21%, signal=41%	973/10000/7409/695/25780/118788/5777/5336/5880/975/2213/7410/5879/1147/5293/971/10451/2885/930/3265/933
hsa00983	Drug metabolism - other enzymes	25	-0.625064	-1.81041	0.00298245	0.0203585	0.0160383	518	tags=24%, list=6%, signal=23%	8824/2947/2941/2946/2949/1066
hsa05200	Pathways in cancer	279	0.327973	1.38841	0.00392702	0.0262359	0.0206685	1847	tags=32%, list=22%, signal=25%	11040/5366/10018/5292/5156/2785/9134/5332/898/10000/2786/107/83593/817/5888/890/54331/1029/25780/2768/2113/5734/8900/5336/3082/598/5915/1021/5880/7481/2782/23236/9915/836/5898/7976/8323/5900/5732/808/7423/109/5154/2252/5159/3162/23462/10125/2787/2250/816/675/2255/1647/5330/5879/1147/4087/1030/5567/2261/1164/5293/3065/5566/94235/5337/1017/6513/3320/2885/9826/1026/10928/4089/57449/113/10297/5728/32…
hsa04215	Apoptosis - multiple species	13	0.730169	1.77345	0.00455535	0.0297996	0.023476	664	tags=31%, list=8%, signal=28%	5366/10018/598/836
hsa04218	Cellular senescence	93	0.423177	1.56664	0.00511439	0.0327728	0.0258183	1747	tags=37%, list=21%, signal=29%	2305/9134/898/10000/9133/993/83593/890/891/1029/2113/8900/1021/678/1111/6009/28996/5928/808/5933/5499/1647/5500/4087/1030/5293/5883/1017/3106/291/5501/1026/5728/3265
hsa04015	Rap1 signaling pathway	138	0.384878	1.49515	0.0052186	0.0327728	0.0258183	1859	tags=36%, list=22%, signal=29%	5156/9771/5332/10000/107/7409/83593/57568/54518/84552/8631/25780/3082/5880/9855/23236/2357/5898/60/5900/7410/808/7423/109/5154/2252/5159/51466/2250/2255/2775/5330/5879/2889/7408/2261/5293/10451/71/5584/135/113/6494/3265/810/5335/2246/2254/11069/375189
hsa03030	DNA replication	22	0.636307	1.79596	0.00709257	0.043668	0.0344015	1230	tags=59%, list=15%, signal=51%	5426/5982/5983/23649/5985/10535/5984/5111/2237/5425/246243/5424/10714
hsa04340	Hedgehog signaling pathway	28	-0.567219	-1.67861	0.00815852	0.0492649	0.0388108	2137	tags=57%, list=26%, signal=43%	2736/5568/2735/596/2737/57467/6608/8945/132884/64399/55733/2619/894/2121/50937/595
